# Supplementary material for: IGFBP-4 tumor and serum levels are increased across all stages of epithelial ovarian cancer
Source: Springer Nature journal article supplement (doi:10.1186/1757-2215-5-3), 2012-01-20
Supplement: Additional file 5 [file 1757-2215-5-3-s5.pdf]

## Additional File 5: Table S4

*Supplementary Table 4: IGFBP-4 and age by ethnicity*

| Ethnicity | Cases |               |         | Controls |        |         |
|-----------|-------|---------------|---------|----------|--------|---------|
|           | n     | IGFBP4        | Age     | n        | IGFBP4 | Age     |
| Ashkenazi | 27    | 1049.43       | 54.56*  | 9        | 538.94 | 43.56** |
| Asian     | 1     | 1755.89       | 48.00   | 3        | 252.66 | 49.33   |
| Black     | 7     | 727.20*       | 51.869* | 2        | 816.45 | 50.00   |
| Hispanic  | 10    | 1721.20       | 63.10   |          |        |         |
| White     | 29    | 1332.57       | 60.76   | 48       | 441.65 | 58.69   |
| Unknown   | 14    | 1 (6%)830.70* | 58.80   | 32       | 242.05 | 50.04** |

\*statistically different from Hispanic; \*\*statistically different from Whites
